# Supplementary material for: Long non-coding RNA expression patterns in lung tissues of chronic cigarette smoke induced COPD mouse model
Source: PubMed Central journal article supplement (PMC5954018; doi:10.1038/s41598-018-25702-3), 2018-05-15
Supplement: 41598_2018_25702_MOESM1_ESM.pdf [file 41598_2018_25702_MOESM1_ESM.pdf]

## Supplement material

### Long non-coding RNA expression patterns in lung tissues of chronic cigarette smoke induced COPD mouse model

Haiyun Zhang<sup>1\*</sup>, Dejun Sun<sup>3\*</sup>, Defu Li<sup>1\*</sup>, Zeguang Zheng<sup>1</sup>, Jingyi Xu<sup>1</sup>, Xue Liang<sup>1</sup>,  
Chenting Zhang<sup>1</sup>, Sheng Wang<sup>1</sup>, Jian Wang<sup>1,2§</sup>, Wenju Lu<sup>1§</sup>

<sup>1</sup>State Key Laboratory of Respiratory Diseases, Guangzhou Institute of Respiratory Health, The First Affiliated Hospital of Guangzhou Medical University, Guangzhou, Guangdong, 510180, China; <sup>2</sup>Division of Translational and Regenerative Medicine, Department of Medicine, The University of Arizona, Tucson, AZ 85721-0202, USA; <sup>3</sup>Division of Pulmonary Medicine, The People's Hospital of Inner Mongolia, Inner Mongolia Medical University, Hohhot, Inner Mongolia, China.

\*These authors contributed equally to this work.

§ Corresponding authors:

Wenju Lu

State Key Laboratory of Respiratory Diseases

Guangzhou Institute of Respiratory Health

The First Affiliated Hospital of Guangzhou Medical University

195 West, Dongfeng Road, Guangzhou, Guangdong, 510180

People's Republic of China

E-mail: wlu92@yahoo.com

Or

Jian Wang

State Key Laboratory of Respiratory Diseases

Guangzhou Institute of Respiratory Health

The First Affiliated Hospital of Guangzhou Medical University

195 West, Dongfeng Road, Guangzhou, Guangdong, 510180

People's Republic of China

[E-mail: jianwang1986@yahoo.com](mailto:jianwang1986@yahoo.com)

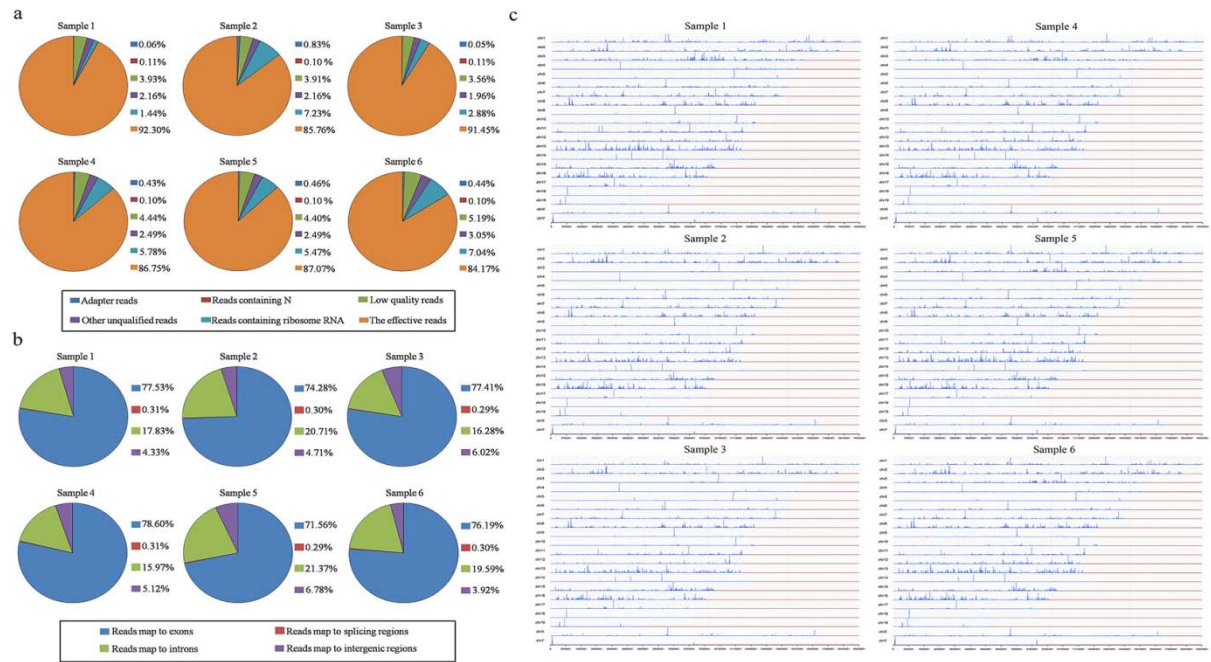

### Supplementary Figure S1

Quality evaluation of RNA sequencing data. (a) Classifications of raw reads. (b) Distributions of the effective reads on the location of genes. (c) Distributions of the effective reads on the genomes. Sample1, sample2 and sample3 are belonged to control group, whereas the other samples are belonged to the chronic CS-induced COPD mouse model group.

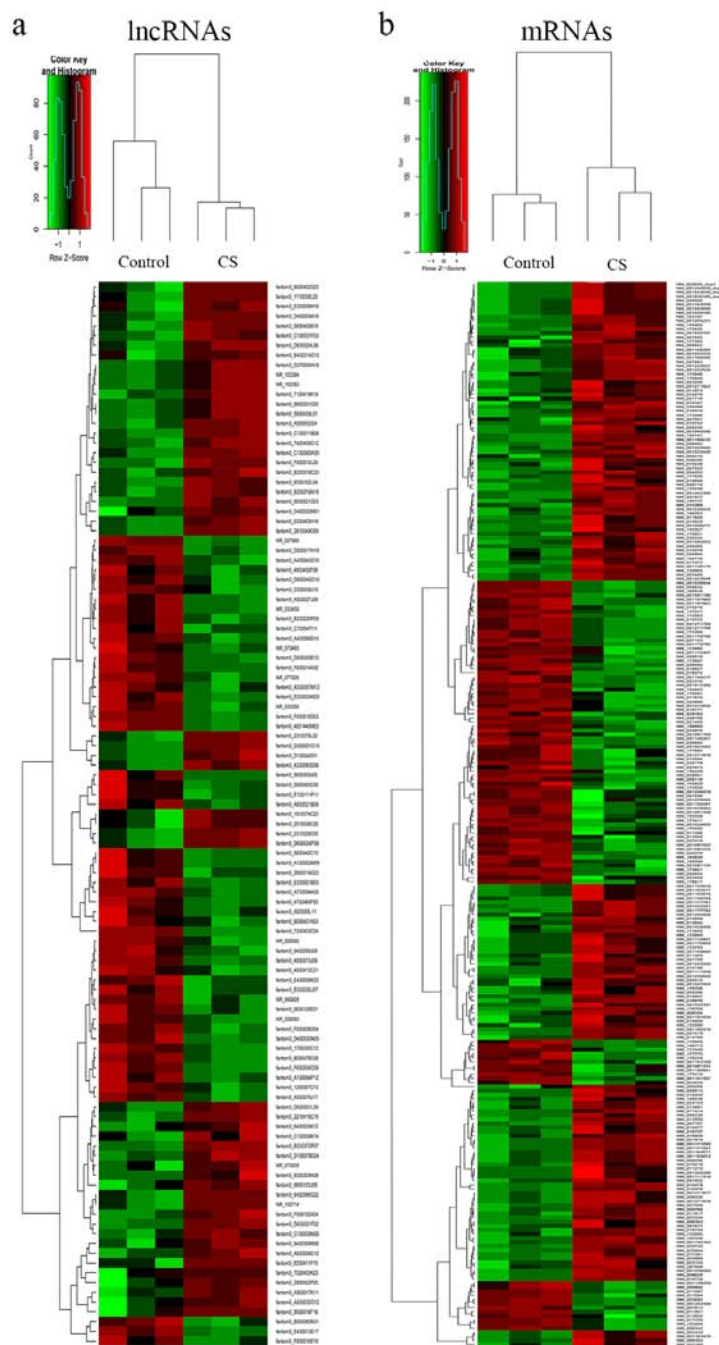

**Supplementary Figure S2**

Unsupervised hierarchical clustering analyses of (a) lncRNAs and (b) mRNAs in lungs of chronic CS-induced COPD model mice and control animals. RNA sequencing data are obtained from 3 mice per group. Red blocks indicate high expression levels of lncRNAs or mRNAs in each sample, whereas green blocks indicate low expression levels of lncRNAs or mRNAs.

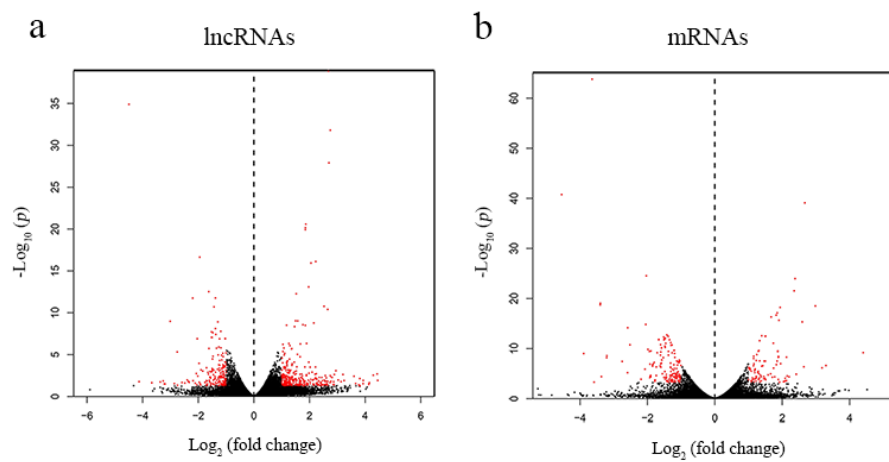

### Supplementary Figure S3

Volcano plots of (a) lncRNAs and (b) mRNAs in lungs of chronic CS-induced COPD model mice and control animals. Red plots indicate significantly differential expressed lncRNAs and mRNAs between these two groups.

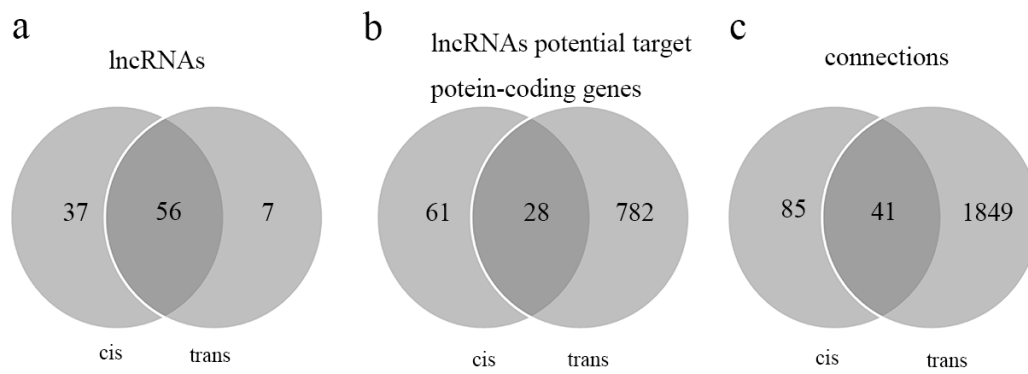

**Supplementary Figure S4**

Venn diagram depicting the overlaps of lncRNAs, lncRNA potential target protein coding genes, and connections between lncRNAs and their associated protein coding genes in lncRNA cis- and trans- regulation patterns.(a) Overlap of lncRNAs.(b) Overlap of lncRNAs potential target protein-coding genes.(c) Overlap of connections between lncRNAs and their potential target protein coding genes.

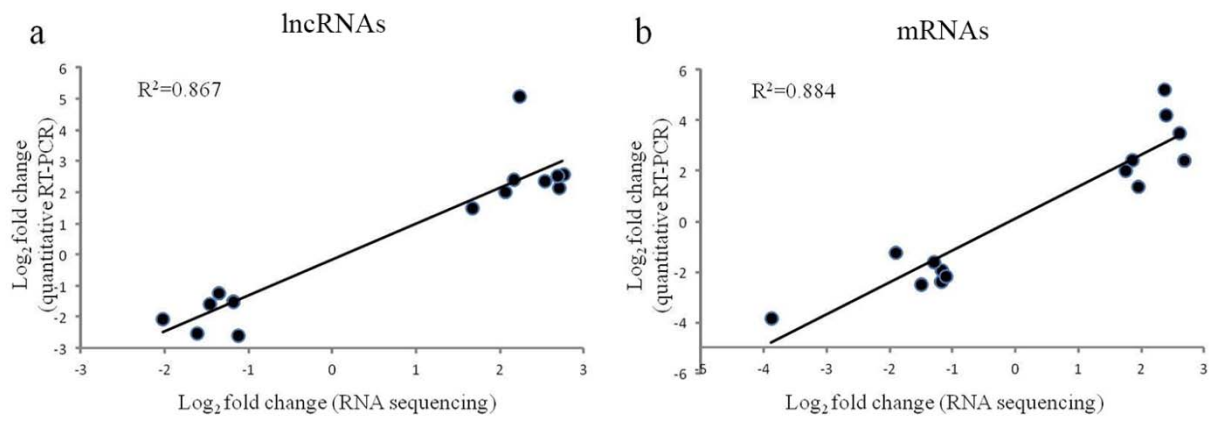

### Supplementary Figure S5

Correlation analysis of fold change data between qRT-PCR and RNA sequencing in mouse. (a) Up- and down- regulated lncRNAs selected for qRT-PCR validation. (b) Up- and down- regulated mRNAs selected for qRT-PCR validation. Black plots indicate lncRNAs or mRNAs. R represents correlation coefficient.

**Supplementary Table S1**

RNA sequencing reads of chronic CS-induced COPD mouse model and control animals.

| ID       | Group                               | Raw reads |          | Total raw reads | Reads with adapters |        | Total reads with adapters | Reads containing N |       | Total reads containing N | Low quality reads |             | Total low quality reads | Other reads needed to be removed from analysis* | Reads containing ribosome RNA | The effective reads |
|----------|-------------------------------------|-----------|----------|-----------------|---------------------|--------|---------------------------|--------------------|-------|--------------------------|-------------------|-------------|-------------------------|-------------------------------------------------|-------------------------------|---------------------|
|          |                                     | Read1     | Read2    |                 | Read1               | Read2  |                           | Read1              | Read2 |                          | Read1             | Read2       |                         |                                                 |                               |                     |
| Sample 1 | Control animals                     | 80093321  | 80093321 | '160,186,642    | 46,697              | 46,453 | '93,150                   | 78558              | 89768 | '168,326                 | 221570<br>0       | 408372<br>1 | '6,299,421              | '3,462,719                                      | '2,310,630                    | '147,852,396        |
| Sample 2 | Control animals                     | 72307427  | 72307427 | '144,614,854    | 606340              | 599237 | '1,205,577                | 70386              | 80520 | '150,906                 | 203802<br>5       | 361644<br>8 | '5,654,473              | '3,129,488                                      | '10,451,530                   | '124,022,880        |
| Sample 3 | Control animals                     | 69158955  | 69158955 | '138,317,910    | 36624               | 36368  | '72,992                   | 68331              | 77775 | '146,106                 | 188833<br>9       | 303015<br>0 | '4,918,489              | '2,708,761                                      | '3,983,556                    | '126,488,006        |
| Sample 4 | Chronic CS-induced COPD mouse model | 77890883  | 77890883 | '155,781,766    | 342395              | 334134 | '676,529                  | 76107              | 86940 | '163,047                 | 221512<br>5       | 470669<br>6 | '6,921,821              | '3,876,319                                      | '8,998,894                    | '135,145,156        |
| Sample 5 | Chronic CS-induced COPD mouse model | 84100609  | 84100609 | '168,201,218    | 392899              | 382975 | '775,874                  | 82431              | 93808 | '176,239                 | 238617<br>2       | 501380<br>7 | '7,399,979              | '4,186,832                                      | '9,203,034                    | '146,459,260        |
| Sample 6 | Chronic CS-induced COPD mouse model | 71413600  | 71413600 | '142,827,200    | 317908              | 310309 | '628,217                  | 69695              | 79871 | '149,566                 | 203550<br>8       | 537620<br>6 | '7,411,714              | '4,358,709                                      | '10,060,178                   | '120,218,816        |

\*Other reads needed to be removed from analysis, such as reads without 3' adapter reads without judgment sequences, reads with 5' adapter contamination and so on.



**Supplementary Table S2**

RNA sequencing data analysis: mapping of RNA sequencing reads to exons, introns, splicing regions and intergenic regions in chronic CS-induced COPD mouse model and control animals.

| ID       | Group                                     | The effective reads | Total mapped reads | Reads map to exons | Reads map to splicing regions | Reads map to introns | Reads map to intergenic regions |
|----------|-------------------------------------------|---------------------|--------------------|--------------------|-------------------------------|----------------------|---------------------------------|
| Sample 1 | Control animals                           | 147,852,396         | '140,574,061       | '108,993,577       | '433,245                      | '25,065,773          | '6,081,466                      |
| Sample 2 | Control animals                           | '124,022,880        | '115,836,570       | '86,041,686        | '346,303                      | '23,992,414          | '5,456,167                      |
| Sample 3 | Control animals                           | '126,488,006        | '119,128,122       | '92,205,678        | '350,935                      | '19,394,919          | '7,176,590                      |
| Sample 4 | Chronic<br>CS-induced COPD<br>mouse model | '135,145,156        | '125,783,965       | '98,870,957        | '385,381                      | '20,087,387          | '6,440,240                      |
| Sample 5 | Chronic<br>CS-induced COPD<br>mouse model | '146,459,260        | '136,097,519       | '97,391,052        | '389,428                      | '29,087,258          | '9,229,781                      |
| Sample 6 | Chronic<br>CS-induced COPD<br>mouse model | '120,218,816        | '112,272,198       | '85,544,144        | '331,616                      | '21,997,497          | '4,398,941                      |

**Supplementary Table S3**

Top 20 significantly up- and down- regulated lncRNAs in lungs of chronic CS-induced COPD mouse model compared with control animals.

| Gene                  | Transcript | Position                 | Strand | Fold<br>Change | <i>P</i> Value |
|-----------------------|------------|--------------------------|--------|----------------|----------------|
| <b>Up-regulated</b>   |            |                          |        |                |                |
| Fantom3_2810049O06    | AK012936   | chr4:151003658-151004621 | —      | 6.72           | <0.001         |
| Fantom3_C130011B08    | AK081361   | chr4:151042408-151043788 | —      | 6.49           | <0.001         |
| Fantom3_D330021G15    | AK084610   | chr4:151011436-151031497 | —      | 6.40           | <0.001         |
| Fantom3_5330405H16    | AK030382   | chr4:151033075-151036561 | —      | 6.29           | <0.001         |
| Fantom3_7420409G12    | AK135741   | chr4:151018475-151021895 | +      | 5.75           | <0.001         |
| Fantom3_F830212L20    | AK157369   | chr8:107385117-107388684 | +      | 4.67           | <0.001         |
| Fantom3_2900002P20    | AK013478   | chr5:120940505-120941428 | —      | 4.64           | 0.035          |
| Fantom3_9530016F16    | AK035325   | chr1:127983186-127984687 | —      | 4.46           | <0.001         |
| Fantom3_A930002I24    | AK044236   | chr11:90336537-90338283  | —      | 4.15           | <0.001         |
| Fantom3_A630036C12    | AK041770   | chrX:162628954-162629652 | —      | 4.06           | 0.036          |
| Fantom3_6230411F15    | AK134477   | chr6:126708330-126736811 | —      | 3.93           | 0.013          |
| Fantom3_C130085H20    | AK081893   | chr7:110120216-110121740 | —      | 3.91           | <0.001         |
| Fantom3_A630032O12    | AK041731   | chr1:127982282-127983640 | —      | 3.72           | <0.001         |
| Fantom3_D630024P09    | AK085437   | chr15:81825471-81826859  | +      | 3.64           | <0.001         |
| Fantom3_2310028D20    | AK009518   | chr15:81825121-81826859  | +      | 3.62           | <0.001         |
| Fantom3_2310076L22    | AK010205   | chr15:81826045-81826859  | +      | 3.61           | <0.001         |
| Fantom3_B230316C23    | AK045874   | chr11:90337983-90339337  | —      | 3.61           | <0.001         |
| Fantom3_9430099M06    | AK020530   | chr8:102706048-102706790 | —      | 3.56           | 0.034          |
| Fantom3_9930123J05    | AK037130   | chr1:127978904-127981691 | —      | 3.39           | <0.001         |
| Fantom3_D630021F02    | AK085396   | chr11:95961598-95964859  | —      | 3.19           | <0.001         |
| <b>Down-regulated</b> |            |                          |        |                |                |
| Fantom3_7330403C04    | AK078618   | chr17:34957618-34959819  | +      | 0.04           | <0.001         |
| Fantom3_E430013E17    | AK088332   | chr7:113219369-113220523 | +      | 0.12           | <0.001         |
| Fantom3_4732480P20    | AK076384   | chr2:126600233-126618661 | —      | 0.15           | 0.001          |
| Fantom3_A530079J17    | AK080197   | chr5:134738232-134738818 | —      | 0.22           | <0.001         |
| Fantom3_1200007C13    | AK004627   | chr2:167827692-167833646 | —      | 0.24           | <0.001         |
| Fantom3_D430030N05    | AK052469   | chr11:58202414-58204772  | +      | 0.25           | 0.016          |
| Fantom3_F830218D03    | AK172595   | chr6:29853890-29867419   | +      | 0.26           | <0.001         |

|                    |           |                           |   |      |        |
|--------------------|-----------|---------------------------|---|------|--------|
| Fantom3_B930085K01 | AK081095  | chr11:43561869-43564424   | + | 0.31 | 0.039  |
| NR_033355          | NR_033355 | chr4:43730033-43734534    | + | 0.32 | <0.001 |
| Fantom3_F830208D04 | AK157250  | chr11:20461258-20464664   | — | 0.33 | 0.001  |
| Fantom3_8030479C08 | AK033265  | chr15:101931536-101933987 | + | 0.35 | <0.001 |
| Fantom3_E030001B03 | AK086777  | chr5:134744725-134747253  | — | 0.35 | <0.001 |
| Fantom3_E030024M20 | AK087068  | chr5:134725602-134729106  | — | 0.35 | <0.001 |
| Fantom3_2900019G23 | AK132033  | chr2:23012822-23014153    | — | 0.36 | 0.007  |
| Fantom3_1700030C12 | AK006530  | chr11:23497756-23499640   | + | 0.36 | <0.001 |
| Fantom3_A430043G10 | AK040013  | chr12:104247895-104248893 | + | 0.36 | 0.004  |
| Fantom3_F630314A02 | AK155529  | chr5:43784045-43786115    | — | 0.37 | <0.001 |
| Fantom3_A730094A05 | AK139286  | chr4:40720058-40722867    | — | 0.38 | <0.001 |
| Fantom3_A430085D10 | AK079839  | chr6:29876678-29879068    | + | 0.38 | <0.001 |
| NR_033450          | NR_033450 | chr12:104247895-104254405 | + | 0.39 | <0.001 |

---

**Supplementary Table S4**

Top 20 significantly up- and down- regulated mRNAs in lungs of chronic CS-induced COPD mouse model compared with control animals.

| Gene symbol         | Gene Name                                             | Transcript   | Position                 | Strand | Fold Change | P Value |
|---------------------|-------------------------------------------------------|--------------|--------------------------|--------|-------------|---------|
| <b>Up-regulated</b> |                                                       |              |                          |        |             |         |
| Dbp                 | D site albumin promoter binding protein               | NM_016974    | chr7:45705247-45710203   | +      | 21.16       | <0.001  |
| Ces1g               | carboxylesterase 1G                                   | NM_021456    | chr8:93302369-93337209   | —      | 9.83        | <0.001  |
| Cyp2a5              | cytochrome P450, family 2, subfamily a, polypeptide 5 | NM_007812    | chr7:26835339-26843264   | +      | 9.07        | <0.001  |
| Necab1              | N-terminal EF-hand calcium binding protein 1          | NM_178617    | chr4:14952245-15149131   | —      | 7.91        | <0.001  |
| Per3                | period circadian clock 3                              | NM_011067    | chr4:151003655-151044622 | —      | 6.37        | <0.001  |
| Olf1342             | olfactory receptor 1342                               | NM_146713    | chr4:118689503-118690450 | —      | 6.25        | <0.001  |
| Ahrr                | aryl-hydrocarbon receptor repressor                   | NM_009644    | chr13:74211118-74292309  | —      | 6.04        | <0.001  |
| Bpifc               | BPI fold containing family C                          | NM_177772    | chr10:85959691-86011860  | —      | 5.33        | 0.003   |
| Nr1d2               | nuclear receptor subfamily 1, group D, member 2       | NM_011584    | chr14:18204056-18239106  | —      | 5.21        | <0.001  |
| Nqo1                | NAD(P)H dehydrogenase, quinone 1                      | NM_008706    | chr8:107388225-107403205 | —      | 5.11        | <0.001  |
| Mogat2              | monoacylglycerol O-acyltransferase 2                  | NM_177448    | chr7:99219084-99238611   | —      | 4.61        | 0.008   |
| Enthd1              | ENTH domain containing 1                              | NM_001163189 | chr15:80452240-80560470  | —      | 4.37        | 0.032   |
| Npy                 | neuropeptide Y                                        | NM_023456    | chr6:49822729-49829505   | +      | 4.36        | <0.001  |
| Tcf15               | transcription factor-like 5 (basic helix-loop-helix)  | NM_178254    | chr2:180621957-180642691 | —      | 4.27        | 0.033   |
| Oxct2a              | 3-oxoacid CoA transferase 2A                          | NM_022033    | chr4:123321875-123323679 | —      | 4.25        | 0.014   |
| D7Ert443e           | DNA segment, Chr 7, ERATO Doi 443, expressed          | NM_001081331 | chr7:134266262-134376828 | —      | 4.16        | 0.037   |
| Spag11b             | sperm associated antigen 11B                          | NM_001039563 | chr8:19140759-19143007   | +      | 3.87        | <0.001  |

|                       |                                                              |              |                           |   |      |        |
|-----------------------|--------------------------------------------------------------|--------------|---------------------------|---|------|--------|
| Hlf                   | hepatic leukemia factor                                      | NM_172563    | chr11:90336535-90390917   | — | 3.84 | <0.001 |
| Sult1d1               | sulfotransferase family 1D, member 1                         | NM_016771    | chr5:87554650-87569006    | — | 3.78 | 0.049  |
| Igfbp2                | insulin-like growth factor binding protein 2                 | NM_008342    | chr1:72824480-72852471    | + | 3.74 | <0.001 |
| <b>Down-regulated</b> |                                                              |              |                           |   |      |        |
| Hspa1b                | heat shock protein 1B                                        | NM_010478    | chr17:34956429-34959238   | — | 0.04 | <0.001 |
| Hspa1a                | heat shock protein 1A                                        | NM_010479    | chr17:34969359-34972156   | — | 0.07 | <0.001 |
| Spon2                 | spondin 2, extracellular matrix protein                      | NM_133903    | chr5:33213518-33218238    | — | 0.08 | <0.001 |
| Gbp10                 | guanylate-binding protein 10                                 | NM_001039646 | chr5:105215699-105239533  | — | 0.08 | 0.049  |
| Arntl                 | aryl hydrocarbon receptor nuclear translocator-like          | NM_007489    | chr7:113207465-113314126  | + | 0.09 | <0.001 |
| Muc11                 | mucin-like 1                                                 | NM_009268    | chr15:103751923-103899300 | — | 0.10 | 0.008  |
| Fga                   | fibrinogen alpha chain                                       | NM_001111048 | chr3:83026153-83033617    | + | 0.11 | <0.001 |
| Npas2                 | neuronal PAS domain protein 2                                | NM_008719    | chr1:39194272-39363240    | + | 0.15 | <0.001 |
| Nfil3                 | nuclear factor, interleukin 3, regulated                     | NM_017373    | chr13:52967209-52981039   | — | 0.17 | 0.002  |
| Avpr1a                | arginine vasopressin receptor 1A                             | NM_016847    | chr10:122448499-122453453 | + | 0.17 | <0.001 |
| Gm12250               | predicted gene 12250                                         | NM_001135115 | chr11:58183843-58190198   | + | 0.17 | <0.001 |
| Gbp6                  | guanylate binding protein 6                                  | NM_194336    | chr5:105270702-105293699  | — | 0.22 | 0.020  |
| Hdc                   | histidine decarboxylase                                      | NM_008230    | chr2:126593659-126624024  | — | 0.24 | <0.001 |
| Cd209a                | CD209a antigen                                               | NM_133238    | chr8:3743395-3748984      | — | 0.24 | <0.001 |
| Hsph1                 | heat shock 105kDa/110kDa protein 1                           | NM_013559    | chr5:149616845-149636315  | — | 0.24 | <0.001 |
| Fam124b               | family with sequence similarity 124, member B                | NM_173425    | chr1:80198699-80213944    | — | 0.25 | <0.001 |
| Ccnjl                 | cyclin J-like                                                | NM_001045530 | chr11:43528749-43586999   | + | 0.26 | <0.001 |
| Serpina3f             | serine (or cysteine) peptidase inhibitor, clade A, member 3F | NM_001168294 | chr12:104214544-104221129 | + | 0.26 | 0.007  |

|       |                                                         |              |                          |   |      |        |
|-------|---------------------------------------------------------|--------------|--------------------------|---|------|--------|
| Tgtp2 | T cell specific GTPase 2                                | NM_001145164 | chr11:49057196-49064212  | — | 0.26 | <0.001 |
| Klra7 | killer cell lectin-like receptor, subfamily A, member 7 | NM_014194    | chr6:130218605-130231687 | — | 0.27 | 0.005  |

---

**Supplementary Table S5**

High throughput studies about patients with COPD from GEO datasets.

| <b>Experiment ID in GEO database</b> | <b>Authors</b>                          | <b>Study design</b>                        | <b>Study type</b> | <b>Organism</b> | <b>Platform</b>            | <b>Samples</b> |
|--------------------------------------|-----------------------------------------|--------------------------------------------|-------------------|-----------------|----------------------------|----------------|
| GSE475                               | Rubinstein NA<br>Carolán B              | case control study                         | in vivo           | Homo sapiens    | HS_AFFY_U133A*             | 7              |
| GSE10006                             | et al. / Crystal RG                     | case control study                         | in vivo           | Homo sapiens    | HS_AFFY_U133PLUS_2*        | 84             |
| GSE22148                             | Singh D et al. / Celli B<br>Shaykhiev R | clinical history study                     | in vivo           | Homo sapiens    | HS_AFFY_U133PLUS_2         | 136            |
| GSE13896                             | et al. / Crystal RG                     | case control study                         | in vivo           | Homo sapiens    | HS_AFFY_U133PLUS_2         | 46             |
| GSE42057                             | Bowler RP et al. / Hughes GJ            | case control study, clinical history study | in vivo           | Homo sapiens    | HS_AFFY_U133PLUS_2         | 131            |
| GSE47460                             | Tedrow J et al. / Schwartz DA           | case control study                         | in vivo           | Homo sapiens    | HS_AGIL_4x44K <sup>#</sup> | 151            |
| GSE47460                             | Tedrow J et al. / Schwartz DA           | case control study, clinical history study | in vivo           | Homo sapiens    | HS_AGIL_8x60K <sup>§</sup> | 424            |
| GSE22047                             | Butler MW et al. / Crystal RG           | case control study                         | in vivo           | Homo sapiens    | HS_AFFY_U133PLUS_2         | 125            |
| GSE8581                              | Bhattacharya S et al. / Mariani TJ      | clinical history study                     | in vivo           | Homo sapiens    | HS_AFFY_U133PLUS_2         | 53             |
| GSE11784                             | Tilley AE et al. / Crystal RG           | case control study                         | in vivo           | Homo sapiens    | HS_AFFY_U133PLUS_2         | 110            |

|          |                                          |                                                        |         |                 |                             |     |
|----------|------------------------------------------|--------------------------------------------------------|---------|-----------------|-----------------------------|-----|
| GSE20257 | Shaykhiev<br>R et al. /<br>Crystal<br>RG | case control<br>study                                  | in vivo | Homo<br>sapiens | HS_AFFY_U<br>133PLUS_2      | 76  |
| GSE29133 | Fujino N /<br>Kubo H                     | case control<br>study                                  | in vivo | Homo<br>sapiens | HS_AFFY_U<br>133PLUS_2      | 6   |
| GSE37768 | Bastos R<br>et al. /<br>Kalko SG         | case control<br>study                                  | in vivo | Homo<br>sapiens | HS_AFFY_U<br>133PLUS_2      | 37  |
| GSE56341 | Vucic EA                                 | case control<br>study                                  | in vivo | Homo<br>sapiens | HS_AFFY_S<br>T1_0*          | 22  |
| GSE37147 | Steiling K<br>/ Spira A                  | case control<br>study                                  | in vivo | Homo<br>sapiens | HS_AFFY_S<br>T1_0           | 244 |
| GSE57148 | Kim WJ et<br>al. / Lee<br>SD             | case control<br>study,<br>clinical<br>history<br>study | in vivo | Homo<br>sapiens | HS_mRNase<br>q_HUMAN_<br>GL | 165 |

---

\* HS\_AFFY\_U133A: Affymetrix Human Genome U133A Array.

\* HS\_AFFY\_U133PLUS\_2: Affymetrix Human Genome U133 Plus 2.0 Array.

# HS\_AGIL\_4x44K: Agilent-014850 Whole Human Genome Array 4x44K G4112F.

§ HS\_AGIL\_8x60K: Agilent-028004 SurePrint G3 Human GE 8x60K Array.

※ HS\_AFFY\_ST1\_0: Affymetrix Human Gene 1.0 ST Array.



**Supplementary Table S6**

Primers used for quantitative RT-PCR validation of 6 up-and down-regulated lncRNAs in mouse.

| Gene name              | Tran script       | Forward (5'→3')           | Reverse (5'→3')           | Product length (bp) | T <sub>m</sub> (°C) |
|------------------------|-------------------|---------------------------|---------------------------|---------------------|---------------------|
| <b>Up-regulated</b>    |                   |                           |                           |                     |                     |
| Fantom3_A9300<br>02I24 | AK0<br>4423<br>6  | TTCAACTCCAGGTG<br>TTCGGT  | CCCCAACACA<br>GATTTTGGCA  | 122                 | 60                  |
| Fantom3_95300<br>16F16 | AK0<br>3532<br>5  | CCTGGTCTGTTGTG<br>GTGAGA  | CAAGTCCCAC<br>CCACCTCTAG  | 192                 | 60                  |
| Fantom3_C1300<br>11B08 | AK0<br>8136<br>1  | AAGCCCAGTACCC<br>TAGATGC  | TTCCACTGCAC<br>ATGAGGACT  | 115                 | 60                  |
| Fantom3_F8302<br>12L20 | AK1<br>5736<br>9  | TTGGAATGCTGAG<br>ACCCTGT  | GGAGTGAAAA<br>CACGTGGCTT  | 173                 | 60                  |
| Fantom3_74204<br>09G12 | AK1<br>3574<br>1  | TCTGCTGATAGGA<br>CGAGCTG  | TTCTCACTAGC<br>TGCCGAACA  | 163                 | 60                  |
| Fantom3_28100<br>49O06 | AK0<br>1293<br>6  | TGAAGTGATTTGG<br>GAGGCCT  | AGCAGGAACC<br>AGAGACCATC  | 112                 | 60                  |
| NR_102714              | NR_<br>1027<br>14 | GCAGAGAGGGAGA<br>CCATCAG  | TGTAGCGTAC<br>CATCCATCCA  | 145                 | 60                  |
| Fantom3_D3300<br>21G15 | AK0<br>8461<br>0  | CCTGTGTTCAAGG<br>GTCCACT  | ACAGGTGCTG<br>GCAACTTCTT  | 88                  | 60                  |
| <b>Down-regulated</b>  |                   |                           |                           |                     |                     |
| NR_033355              | NR_<br>0333<br>55 | CAGAAATCATGGA<br>GACCGCG  | GATGCAGGTA<br>ATGGCCATGG  | 73                  | 60                  |
| NR_028593              | NR_<br>0285<br>93 | AGGGTACTGGAGT<br>GGTTTGG  | GGCCATCAAC<br>CAGAAAAGCA  | 75                  | 60                  |
| Fantom3_A4300<br>43G10 | AK0<br>4001<br>3  | GGACCCCACTTCCC<br>TTGTAA  | AGTGTCTGAG<br>CAGGTGTCTC  | 89                  | 60                  |
| NR_033450              | NR_<br>0334<br>50 | GCATCTGAAACAC<br>TTGACGCC | CCATGCATTTG<br>CAGGGTTGAG | 136                 | 60                  |
| Fantom3_12000          | AK0               | TACAAACCTGGGC             | AAGCAGAGGC                | 103                 | 60                  |

|                         |      |                |             |     |    |
|-------------------------|------|----------------|-------------|-----|----|
| 07C13                   | 0462 | TCACCAC        | TAACGGTGTC  |     |    |
|                         | 7    |                |             |     |    |
| Fantom3_D8300           | AK0  | TGGTCTATACCCGC | CTTTCCTCAGC | 108 | 60 |
| 09E10                   | 8578 | TGACCT         | GAGGGATGT   |     |    |
|                         | 8    |                |             |     |    |
| <b>Internal control</b> |      |                |             |     |    |
| 18s                     | 18s  | GCAATTATCCCA   | GGCCTCACTA  | 123 | 60 |
|                         |      | TGAACG         | AACCATCCAA  |     |    |

---

**Supplementary Table S7**

Primers used for quantitative RT-PCR validation of 6 up-and down-regulated mRNAs in mouse.

| Gene name           | Transcript            | Forward (5'→3')          | Reverse (5'→3')              | Product length (bp)         | T <sub>m</sub> (°C) |                           |
|---------------------|-----------------------|--------------------------|------------------------------|-----------------------------|---------------------|---------------------------|
| <b>Up-regulated</b> |                       |                          |                              |                             |                     |                           |
| Per3                | NM_011067             | GAAGCAGTGCCA<br>GCAGTATA | AAGGGCTTCGTC<br>TCTCTGTC     | 101                         | 60                  |                           |
|                     | Nqo1                  | NM_008706                | GGAAGCTGCAGA<br>CCTGGTGA     |                             |                     | CCTTTCAGAATG<br>GCTGGCA   |
| Hlf                 |                       | NM_072563                | GACAGCTCCCCT<br>TGAACCC      | CTGCTGCTCTCA<br>TCGTCCA     | 151                 | 61                        |
|                     | Ggt1                  | NM_008116                | TTTGTTCATCATC<br>GGCCTCTGT   | CCCGTCCAATCT<br>CTGAGCAG    |                     |                           |
| Ahrr                |                       | NM_009644                | GTGGTTACGATG<br>GACTCAAGG    | GTCCCCTGAACA<br>GTGAAATGC   | 124                 | 60                        |
|                     | Nr1d2                 | NM_011584                | TGAACGCAGGAG<br>GTGTGATTG    | GAGGACTGGAA<br>GCTATTCTCAGA |                     |                           |
| Uchl1               |                       | NM_011670                | AGGGACAGGAA<br>GTTAGCCCTA    | AGCTTCTCCGTT<br>TCAGACAGA   | 160                 | 60                        |
|                     | <b>Down-regulated</b> |                          |                              |                             |                     |                           |
| Serpina3f           | NM_001168             | TGGGAGATGCCC<br>TTTGATCC | AGTAGGGTGTCTG<br>TCAGGTTATTA | 112                         | 60                  |                           |
|                     | Ggt5                  | NM_011820                | TTCAATGGGACA<br>GAAACCTTGAG  |                             |                     | TCCCTGTGTATA<br>AGACCTCCG |
| Dnaj1               |                       | NM_008298                | ACCACTTACTAC<br>GATGTTTTGGG  | GCCCTCTTTAAT<br>CGCCTGCT    | 213                 | 61                        |
|                     | Hspa5                 | NM_001163                | GCATCACGCCGT<br>CGTATGT      | ATTCCAAGTGCG<br>TCCGATGAG   |                     |                           |
| Fkbp4               |                       | NM_010219                | CCTCTCGAAGGA<br>GTGGACATC    | TCCCCGATCATG<br>GGTGTCT     | 98                  | 61                        |
|                     | Hspa1a                | NM_010479                | TGGTGCAGTCCG<br>ACATGAAG     | GCTGAGAGTCGT<br>TGAAGTAGGC  |                     |                           |
| Il1rl1              |                       | NM_001025                | TGACACCTTACA<br>AAACCCGGA    | AGGTCTCTCCCA<br>TAAATGCACA  | 178                 | 61                        |
|                     | 602                   | <b>Internal control</b>  |                              |                             |                     |                           |
| 18s                 |                       | 18s                      | GCAATTATTCCC<br>CATGAACG     | GGCCTCACTAAA<br>CCATCAA     | 123                 | 60                        |

### Supplementary Table S8

Nucleotide homology, gene loci and primers used for quantitative RT-PCR validation of human homologue of the differential expressed lncRNAs in chronic CS-induced COPD mouse model versus control animals.

| The equivalent lncRNAs in human        | Nucleotide homology between mouse and human (%) | Gene loci                   | Strand | Forward (5'→3')                   | Reverse (5'→3')                                      | Product length (bp) | Tm (°C) |
|----------------------------------------|-------------------------------------------------|-----------------------------|--------|-----------------------------------|------------------------------------------------------|---------------------|---------|
| Fantom3A930002<br>I24 human homologue  | 80                                              | Chr17:<br>55324820-5325059  | +      | TTTTGGC<br>AACACC<br>ACAAAG<br>A  | GATA<br>AAGG<br>TTTGG<br>ACTTA<br>ACAG<br>CA<br>CACA | 116                 | 60      |
| Fantom3_C13001<br>1B08 human homologue | 83                                              | Chr1:<br>7785438-7785587    | +      | TGAACA<br>GCAAGAT<br>CGAAAC<br>AG | GCGG<br>AGAG<br>CATAG<br>TTG<br>GCTTT<br>GTAAT       | 131                 | 60      |
| Fantom3_F83021<br>2L20 human homologue | 73                                              | chr16:<br>69710466-69710627 | —      | TATGGCA<br>GAAGGG<br>AATTGCT      | TGAA<br>AGCA<br>AGAA<br>A                            | 162                 | 60      |
| Fantom3_7420409<br>G12 human homologue | 88                                              | chr1:<br>7819372-7819436    | +      | GCACAG<br>CCCATCC<br>TATCAAC      | TTGCG<br>GTCTC<br>ATACC<br>TGATG<br>CTGA             | 62                  | 60      |
| Fantom3_2810049<br>O06 human homologue | 66                                              | chr1:<br>7844617-7845152    | +      | TTCTTTG<br>CCTTAGC<br>ACACGTT     | CAGTT<br>CTGC<br>GACA<br>AGC<br>GTTGA                | 82                  | 60      |
| NR_102714<br>human homologue           | 83                                              | chr4:<br>41256890-41257009  | +      | CCGCTAG<br>CTGTTTT<br>TCGTCT      | TCTCC<br>ATCGG<br>CTTGA<br>GCTC                      | 120                 | 60      |
| Fantom3_D33002<br>1G15 human homologue | 81                                              | Chr1:<br>7803047-7819420    | +      | ATTGGTC<br>GGCATAA<br>AGTTCG      | ACGT<br>GAAC<br>TGGCT<br>GTA                         | 144                 | 60      |

|                      |    |  |  |            |   |  |         |       |     |    |
|----------------------|----|--|--|------------|---|--|---------|-------|-----|----|
| NR_033355            |    |  |  | Chr9:      |   |  | GCCCTGA | CAGAT |     |    |
| human homologue      | 78 |  |  | 35911116-3 | + |  | AATTCTG | TTGG  | 97  | 60 |
|                      |    |  |  | 5911574    |   |  | AAACCA  | AAAG  |     |    |
|                      |    |  |  |            |   |  |         | GCCCA |     |    |
|                      |    |  |  |            |   |  |         | TA    |     |    |
|                      |    |  |  |            |   |  |         | AGAC  |     |    |
|                      |    |  |  |            |   |  |         | CTGA  |     |    |
| NR_028593            |    |  |  | Chr12:     |   |  | GAGGAC  | GTGG  |     |    |
| human homologue      | 81 |  |  | 9233455-92 | — |  | CTGTCTG | AGGA  | 101 | 60 |
|                      |    |  |  | 33555      |   |  | TGGCATC | GAAG  |     |    |
|                      |    |  |  |            |   |  |         | C     |     |    |
|                      |    |  |  |            |   |  |         | GAGT  |     |    |
|                      |    |  |  |            |   |  |         | CTCTC |     |    |
| NR_033450            |    |  |  | Chr14:     |   |  | CGTGGTG | CACC  |     |    |
| human analogues      | 72 |  |  | 94614589-9 | + |  | GAGCTG  | GCTTC | 120 | 60 |
|                      |    |  |  | 4623819    |   |  | AAGTACA | AG    |     |    |
|                      |    |  |  |            |   |  |         | ATGCT |     |    |
|                      |    |  |  |            |   |  |         | CTGA  |     |    |
| Fantom3_D83000       |    |  |  | Chr22:     |   |  | CTCCAAG | GGGT  |     |    |
| 9E10 human homologue | 81 |  |  | 24232825-2 | — |  | GTCTGCT | TGAC  | 111 | 60 |
|                      |    |  |  | 4244755    |   |  | CGGATA  | GAC   |     |    |

---

**Supplementary Table S9**

Clinical characteristics of the donors and patients with COPD. The age variable of two groups fits normal distribution and homogeneity of variance.

| No. | Sex  | Age | Smoke | Underlying Condition | FEV <sub>1</sub> /FVC (%) |
|-----|------|-----|-------|----------------------|---------------------------|
| 1   | Male | 90  | No    | Donor                | >70                       |
| 2   | Male | 80  | No    | Donor                | >70                       |
| 3   | Male | 52  | No    | Donor                | >70                       |
| 4   | Male | 77  | No    | Donor                | >70                       |
| 5   | Male | 61  | No    | Donor                | >70                       |
| 6   | Male | 67  | No    | Donor                | >70                       |
| 7   | Male | 68  | Yes   | COPD                 | <70                       |
| 8   | Male | 55  | Yes   | COPD                 | <70                       |
| 9   | Male | 68  | Yes   | COPD                 | <70                       |
| 10  | Male | 63  | Yes   | COPD                 | <70                       |
| 11  | Male | 60  | Yes   | COPD                 | <70                       |
| 12  | Male | 73  | Yes   | COPD                 | <70                       |
| 13  | Male | 74  | Yes   | COPD                 | <70                       |

**Supplementary Table S10**

Primers used for quantitative RT-PCR validation of significantly differential expressed mRNAs in human bronchial epithelial cells 16HBE cells, human lung carcinoma A549 cells and human PBMC.

| Gene name               | Transcript   | Forward(5'→3')              | Reverse(5'→3')              | Product length (bp) | T <sub>m</sub> (°C) |
|-------------------------|--------------|-----------------------------|-----------------------------|---------------------|---------------------|
| PER3                    | NM_016831    | GCAGAGGAAATT<br>GGCGGACA    | GGTTTATTGCGT<br>CTCTCCGAG   | 123                 | 60                  |
| NQO1                    | NM_01025433  | GAAGAGCACTGA<br>TCGTA CTGGC | GGATACTGAAA<br>GTTCGCAGGG   | 196                 | 60                  |
| HLF                     | NM_002126    | CTGGGGCCTACC<br>TTATGGGA    | GGGGAATGCCA<br>TTTTCTGACA   | 103                 | 60                  |
| GGT1                    | NM_001288833 | TTCATCGCTGTG<br>GTGCAAGC    | TCTGCTGCTCAC<br>AGGGGAAG    | 194                 | 60                  |
| AHRR                    | NM_001242412 | CCCCGCCCTTGG<br>AGACAGGA    | AGTACTCGGTGG<br>GCGTGCCT    | 87                  | 60                  |
| NR1D2                   | NM_001145425 | TTTAGTGGCATG<br>GTTCTACTGTG | AGCCTTCGCAAG<br>CATGAACT    | 82                  | 60                  |
| UCHL1                   | NM_004181    | AATGTCGGGTAG<br>ATGACAAGGT  | GGCATTCGTCCA<br>TCAAGTTCATA | 88                  | 60                  |
| SERPINA3                | NM_001085    | TGCCAGCGCACT<br>CTTCATC     | TGTCGTTCAAGT<br>TATAGTCCCTC | 167                 | 60                  |
| GGT5                    | NM_004121    | GTCAGCCTAGTC<br>CTGCTGG     | GGATGGCTCGTC<br>CAATATCCG   | 157                 | 60                  |
| DNAJA1                  | NM_001539    | ACTGGAGCCAGG<br>CGATATTAT   | CTTCAACGAGCT<br>GTATGTCCAT  | 107                 | 60                  |
| HSPA5                   | NM_005347    | CATCACGCCGTC<br>CTATGTCG    | CGTCAAAGACC<br>GTGTTCTCG    | 104                 | 60                  |
| FKBP4                   | NM_002014    | GAAGGCGTGCTG<br>AAGGTCAT    | TGCCATCTAATA<br>GCCAGCCAG   | 103                 | 62                  |
| HSPA1A                  | NM_005345    | GAACAAGCGAGC<br>CGTGAG      | AGGGTGCTTCGG<br>AACAGG      | 177                 | 60                  |
| IL1RL1                  | NM_003856    | ATGGGGTTTTGG<br>ATCTTAGCAAT | CACGGTGTA ACT<br>AGGTTTTCTT | 138                 | 60                  |
| <b>Internal control</b> |              |                             |                             |                     |                     |
| 18S                     | 18S          | GCAATTATTCCC<br>CATGAACG    | GGCCTCACTAAA<br>CCATCCAA    | 123                 | 60                  |
